# Supplementary material for: Evaluating the substitution effects of bis(β-iminoenolate)copper(ii) complexes on their photophysical, DNA binding/photocleavage, and cytotoxic activities
Source: Royal Society of Chemistry journal article supplement (doi:10.1039/d4nj00290c), 2024-01-01
Supplement: d4nj00290c1.pdf [file d4nj00290c1.pdf]

*Supporting information*

**Evaluating the substitution effects of Bis( $\beta$ -iminoenolate)copper(II) complexes on their Photophysical, DNA binding/photocleavage, and cytotoxic activity**

Panneerselvam Arun Prasanth,<sup>a</sup> Periyappan Nantheeswaran,<sup>a</sup> Kaliyan Prabakaran<sup>b, e</sup>, Rajendran Senthilnathan<sup>c</sup>, Faruck Lukmanul Hakkim,<sup>d</sup> Arunachalam Jothi,<sup>c</sup> Muthu Seenivasa Perumal,<sup>b</sup> Veerappan Anbazhagan,<sup>c\*</sup> Mariappan Mariappan<sup>a\*</sup>

---

*a) Department of Chemistry, SRMIST, Kattankulathur, Chennai, Tamil Nadu, India, 603 203*

*b) Department of Chemistry, The Gandhigram Rural Institute-Deemed to be University, Gandhigram, Dindigul district, Tamilnadu- 624 302, India.*

*c) School of Chemical and Biotechnology, SASTRA Deemed University, Thirumalaisamudaram, Thanjavur, Tamil Nadu, India, 613 401*

*d) The Hormel Institute, University of Minnesota, 801 16th Ave NE, Austin, MN 55912, United States of America.*

*e) Department of Advanced Organic Materials Engineering, Chungnam National University, 220 Gung-dong, Yuseong-gu, Daejeon, 305-764, Republic of Korea.*

\* Corresponding author

M. M.: Phone: +91 8870249167; Fax: +91 44-27453903

e-mail: [tmmari@yahoo.com](mailto:tmmari@yahoo.com), [mariappm@srmist.edu.in](mailto:mariappm@srmist.edu.in)

V. A.: Phone: +91 4362-264101-3689; Fax: +91 4362-264120

Email: [anbazhagan@scbt.sastra.edu](mailto:anbazhagan@scbt.sastra.edu)

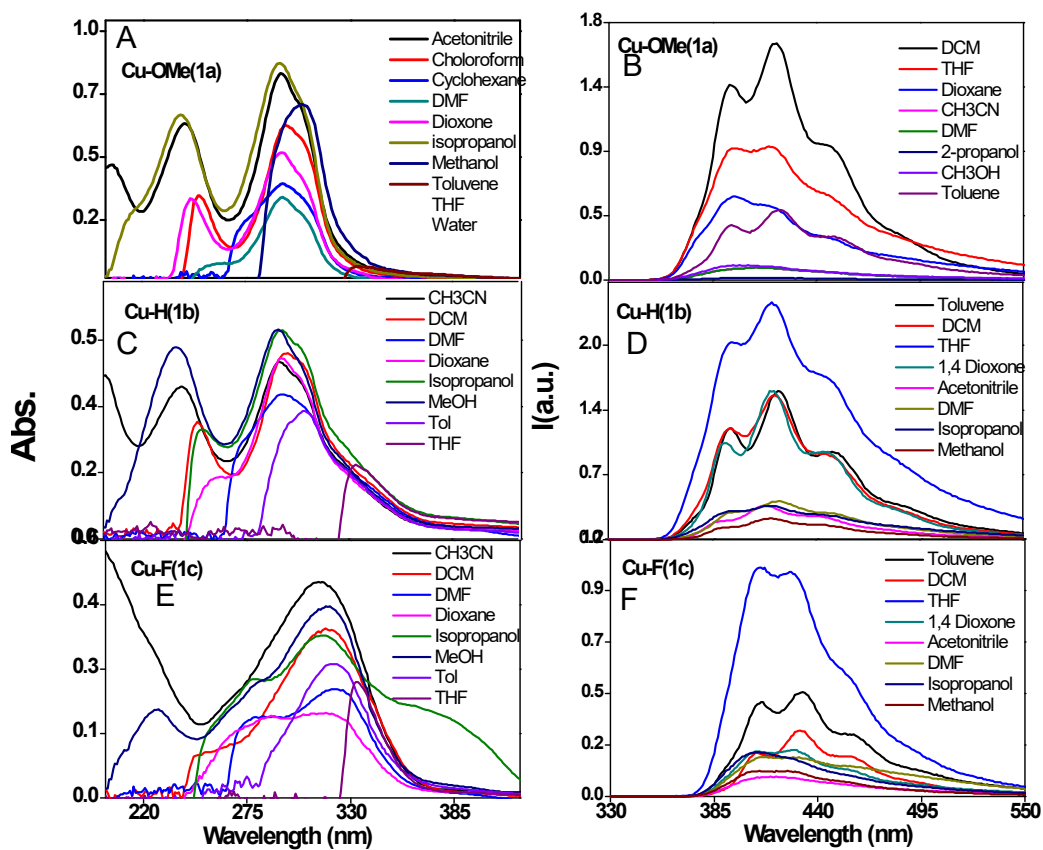

**Fig. S1:** Solvent dependent absorption (A, C, E) and emission spectra (B, D, F) for the compounds **1a-c**. For fluorescence spectra, 0.2 OD of the solution was prepared..

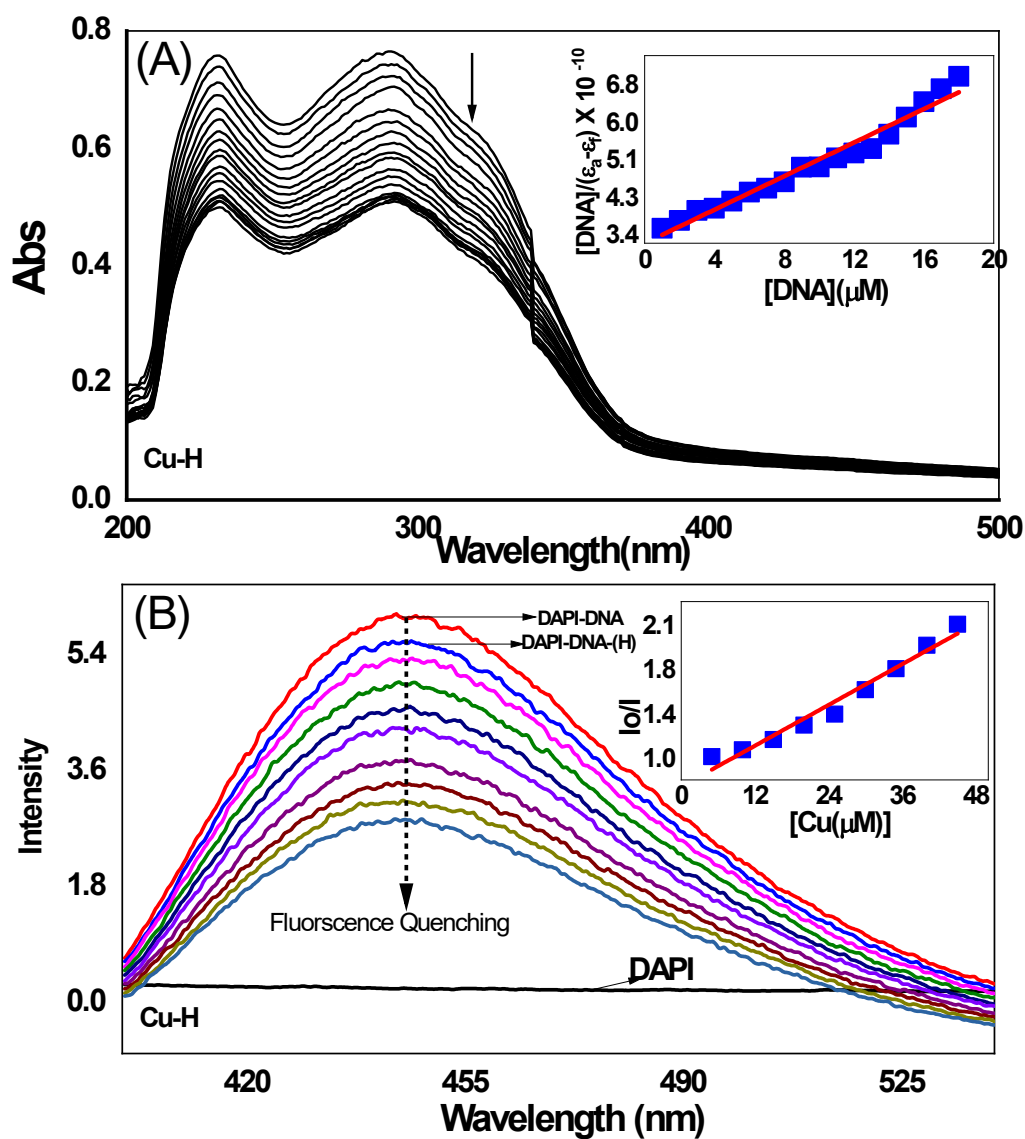

Fig. S2: (A) UV-Vis spectral titration of complex **1b** with CT DNA in Tris-HCl buffer (hypochromism) [**1b**]=10 $\mu$ M, [**DNA**<sub>NP</sub>] = 0-100  $\mu$ M.. (B) Emission spectra of DAPI [50  $\mu$ M] bound to DNA in the presence of **1b** complex [10  $\mu$ M] with increasing concentration (0-50  $\mu$ M) in phosphate buffer.

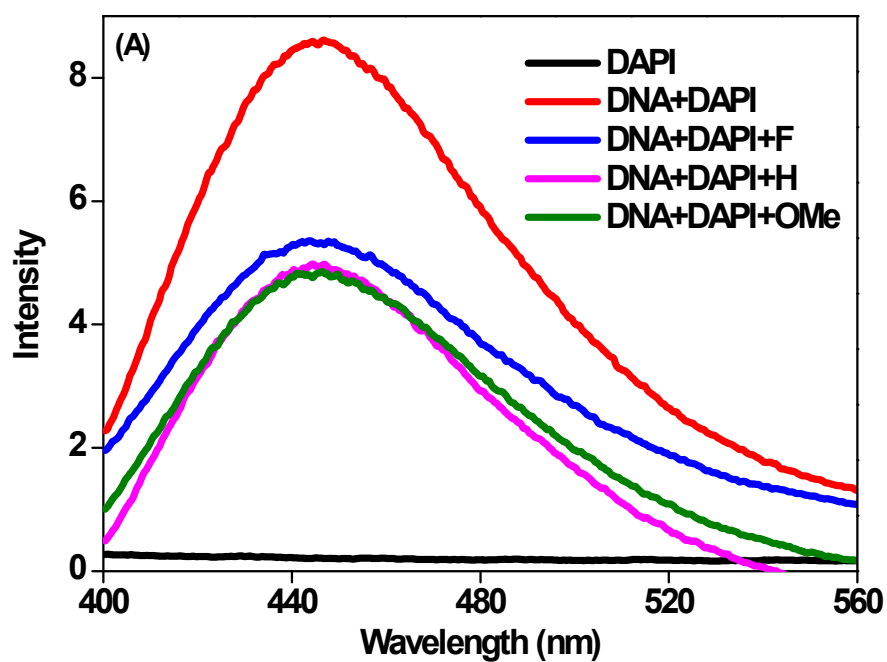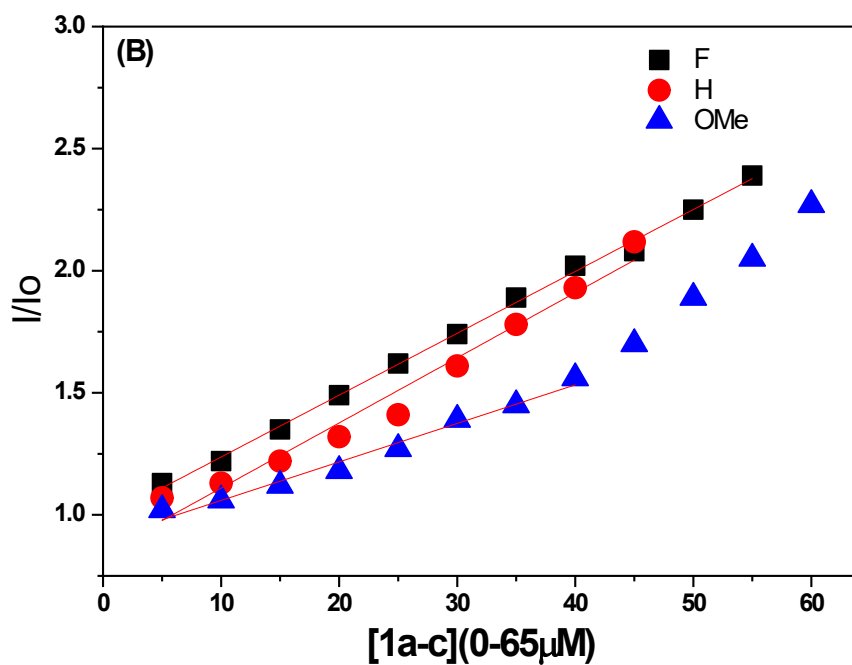

Fig. S3: (A) Emission spectral overlap of DAPI, DAPI with DNA and quenching spectra of complexes **1a-c** [10  $\mu\text{M}$ ] with the DAPI [50  $\mu\text{M}$ ] and DNA emission maxima mixture in phosphate buffer solution. (B) Curve fitting of the ratio between  $I/I_0$  with the increase in the complexes **1a-c** concentration (0-65  $\mu\text{M}$ ).

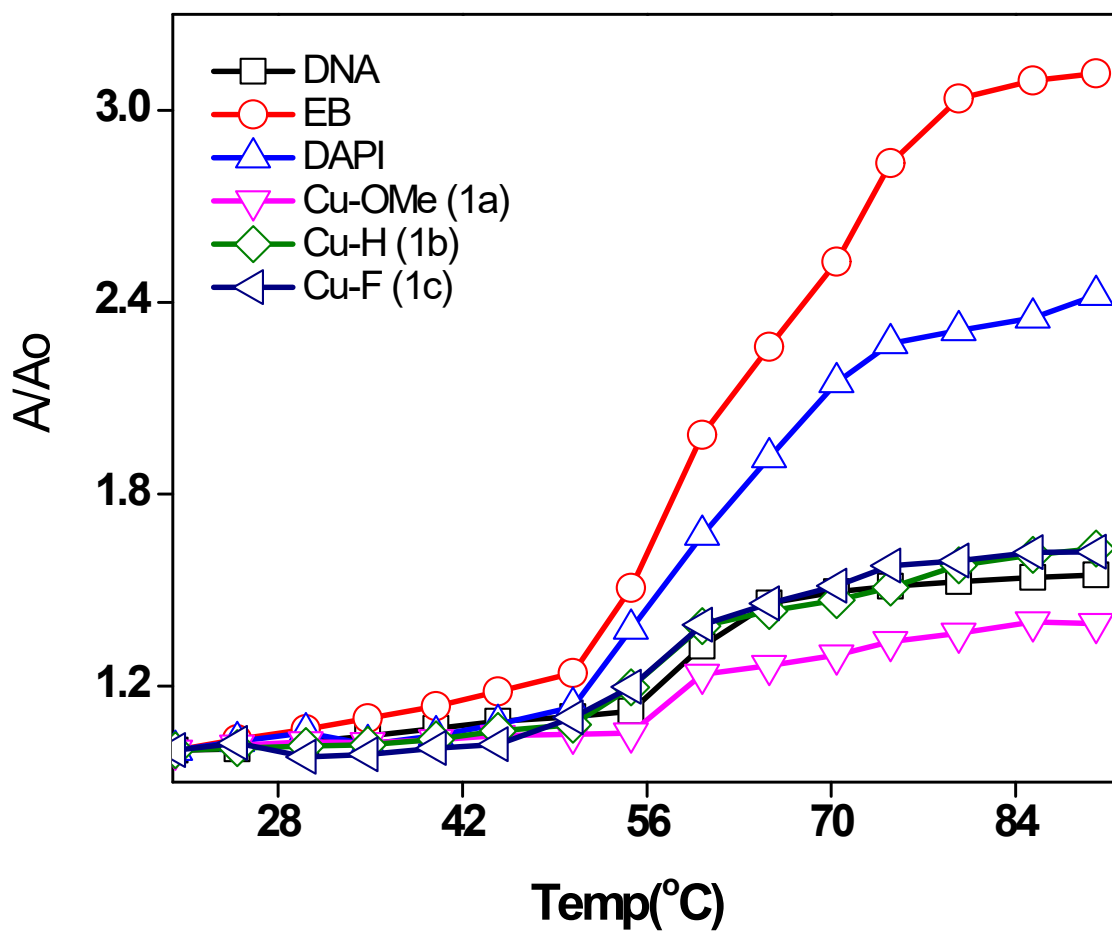

Fig. S4: Thermal melting profile curves of CT DNA alone and in the presence of complexes **1a-c** in buffer B [**1a-c**]= 10  $\mu$ M, [DNA]= 100 $\mu$ M

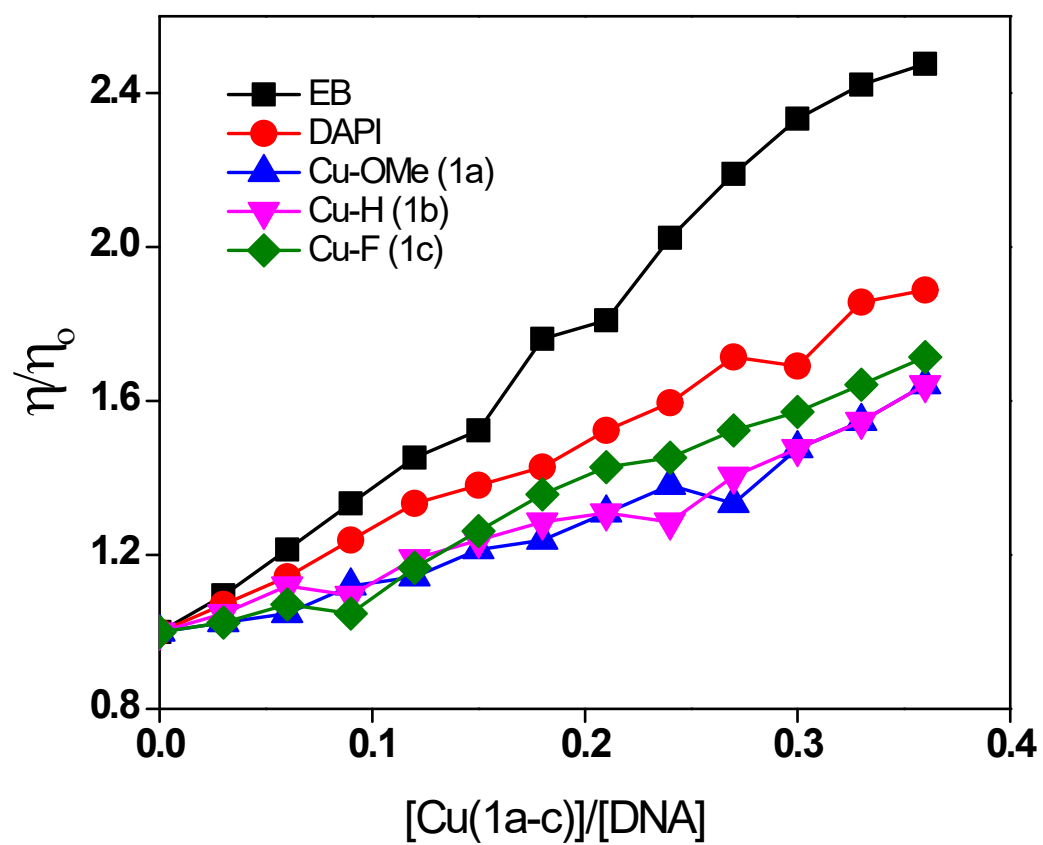

Fig. S5: Plot of relative viscosity versus  $[1a-c]/[CT\ DNA]$  in in buffer C  $[1a-c] = 10\ \mu M$ ,  $[DNA] = 100\ \mu M$

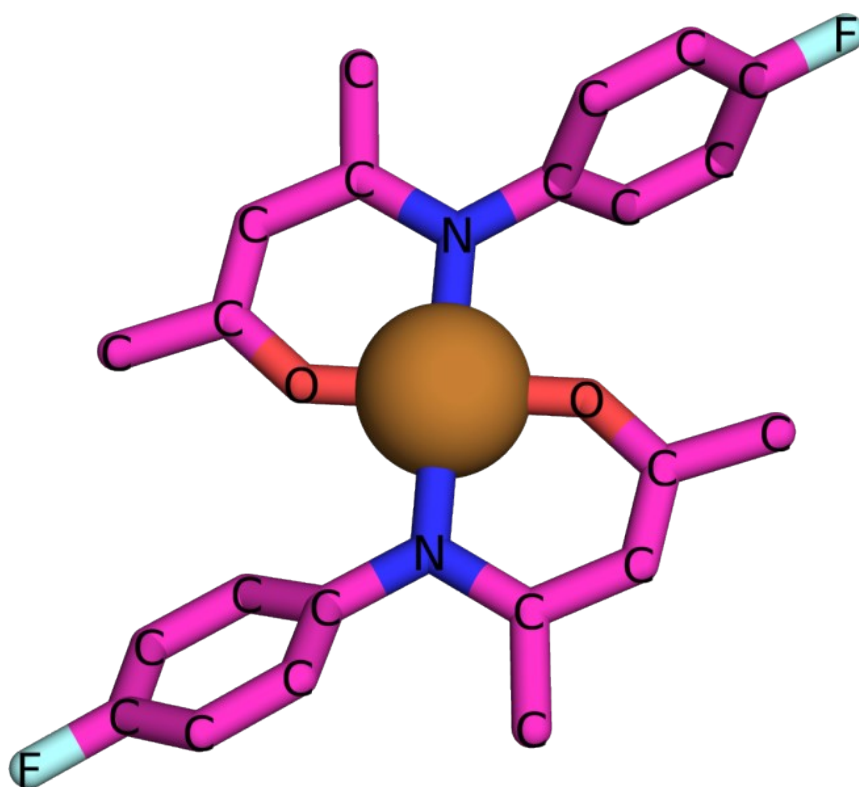

Fig. S6: DFT energy minimized structure of representative structure of the complex **1c**.

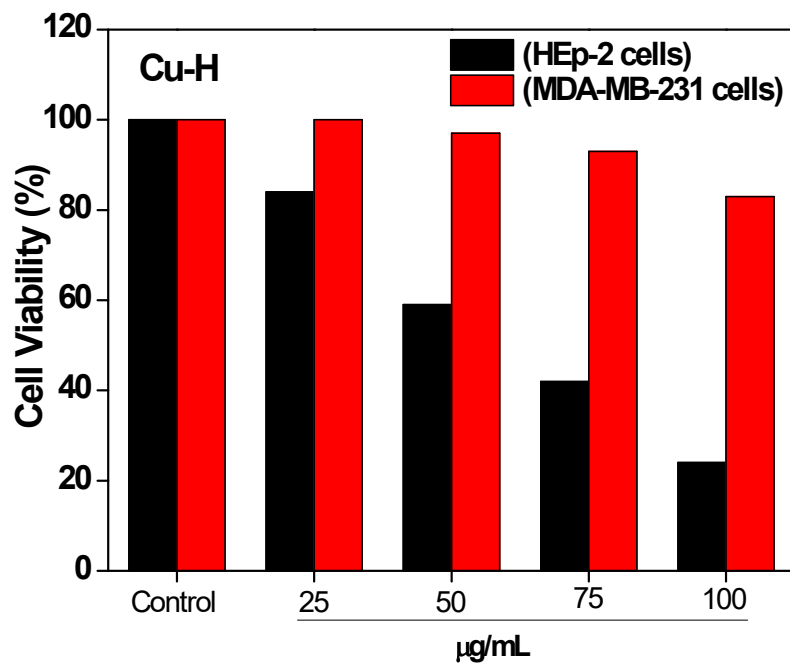



**Table S1:** Molar conductivity data for the complexes recorded in methanol.

Conductivity of Cu (II) complexes

| S.No | Samples | 200 m $\Omega$ | 2 m $\Omega$ | 200 $\mu\Omega$ | 20 $\mu\Omega$ |
|------|---------|----------------|--------------|-----------------|----------------|
| 1    | H       | Nil            | .001         | 2.0             | 2.25           |
| 2    | F       | Nil            | .002         | 2.3             | 2.54           |
| 3    | OMe     | Nil            | .001         | 2.1             | 2.35           |

Complexes concentration; 1 mM in 10 ml MeOH

**Table S2:** Redox potential data of compounds 1a-c in CH<sub>3</sub>CN

| <b>Compound</b> | <b>Oxidation<sup>b</sup><br/>E<sub>1/2</sub> (V vs SCE)</b> | <b>Reduction<sup>b</sup><br/>E<sub>1/2</sub> (V vs SCE)</b> |
|-----------------|-------------------------------------------------------------|-------------------------------------------------------------|
| Cu-OMe          | +1.03                                                       | -1.21, -1.48                                                |
| Cu-H            | +0.96                                                       | -1.35, -1.76                                                |
| Cu-F            | ---                                                         | -1.45, -1.91                                                |

Error limits: E<sub>1/2</sub>, ± 0.02 V, 0.1 M TBAPF<sub>6</sub>

**Table S3:** Binding and quenching constant ( $K_b$ ,  $K_{app}$ ,  $K_{SV}$ ) and Melting temperature data for the reference and studied complexes 1a-c.

| <i>Compound</i> | $K_b$ ( $M^{-1}$ ) | $K_{SV}$ ( $M^{-1}$ ) | $K_{app}$ ( $M^{-1}$ ) | $T_m$ ( $^{\circ}C$ ) | $\Delta G$ ( $kJmol^{-1}$ ) |
|-----------------|--------------------|-----------------------|------------------------|-----------------------|-----------------------------|
| DNA             | --                 | -                     | -                      | 57.4                  | -                           |
| EB              | $> 10^7$           | -                     | -                      | 67.8                  | -44.86                      |
| DAPI            | $5.64 \times 10^5$ | -                     | $1.69 \times 10^5$     | 64.1                  | -34.23                      |
| Cu-OMe          | $1.29 \times 10^4$ | $2.12 \times 10^4$    | $1.98 \times 10^4$     | 58.1                  | -23.44                      |
| Cu-H            | $0.58 \times 10^5$ | $2.43 \times 10^4$    | $1.26 \times 10^5$     | 59.3                  | -27.15                      |
| Cu-F            | $1.57 \times 10^5$ | $2.97 \times 10^4$    | $1.74 \times 10^5$     | 61.6                  | -29.48                      |

a) Error limits:  $K_b$ ,  $\pm 5\%$ ;  $T_m$ ,  $\pm 1$   $^{\circ}C$
